# Supplementary material for: Open Access Publishing and Citation Archives: Background and Controversy
Source: Royal Society of Chemistry journal article supplement (doi:10.1039/d2sm00497f), 2013-01-28
Supplement: d2sm00497f1.pdf [file d2sm00497f1.pdf]

## Electronic Supplementary Information: Dynamic ordering caused by a source-sink relation between two droplets

Chiho Watanabe<sup>1</sup>, Shinpei Tanaka<sup>2</sup>, Richard J.G. Löffler<sup>3</sup>, Martin M. Hanczyc<sup>3,4</sup>, and Jerzy Górecki<sup>5</sup>

<sup>1</sup>Graduate School of Integrated Sciences for life, Hiroshima University, 1-7-1 Kagamiyama, Higashi-Hiroshima 739-8521, Japan. E-mail: cwatan@hiroshima-u.ac.jp

<sup>2</sup>Graduate School of Advanced Science and Engineering, Hiroshima University, 1-7-1 Kagamiyama, Higashi-Hiroshima 739-8521, Japan.

<sup>3</sup>Laboratory for Artificial Biology, Department of Cellular, Computational and Integrative Biology (CIBIO), University of Trento, Polo Scientifico e Tecnologico Fabio Ferrari, Polo B, Via Sommarive 9, Povo, 38123, Trentino Alto-Adige, Italy.

<sup>4</sup>Chemical and Biological Engineering, University of New Mexico, Albuquerque, NM, 87106, USA.

<sup>5</sup>Institute of Physical Chemistry, Polish Academy of Sciences, Kasprzaka 44/52, 01-224 Warsaw, Poland.

August 17, 2022

## S1. Description of movies

- **Movie 1: d2sm00497f2.mp4**  
A real-time movie of decanol and paraffin droplets put on the surface of water saturated by 1-decanol. No self-propulsion took place.
- **Movie 2: d2sm00497f3.mp4**  
Initial motion of droplets, accelerated 20 times.  $t \in [0 \text{ h}, 1 \text{ h}]$  and  $c_{\text{SB}} = 0.005 \text{ wt\%}$ .
- **Movie 3: d2sm00497f4.mp4**  
Initial motion of droplets, accelerated 20 times.  $t \in [0 \text{ h}, 1 \text{ h}]$  and  $c_{\text{SB}} = 0.05 \text{ wt\%}$ .
- **Movie 4: d2sm00497f5.mp4**  
Initial motion of droplets, accelerated 20 times.  $t \in [0 \text{ h}, 1 \text{ h}]$  and  $c_{\text{SB}} = 0.2 \text{ wt\%}$ .
- **Movie 5: d2sm00497f6.mp4**  
Binary-star like motion of the droplets, accelerated 20 times.  $t \in [4 \text{ h}, 5 \text{ h}]$  and  $c_{\text{SB}} = 0.005 \text{ wt\%}$ .
- **Movie 6: d2sm00497f7.mp4**  
Rectilinear oscillation of the decanol droplet, accelerated 20 times.  $t \in [4 \text{ h}, 5 \text{ h}]$  and  $c_{\text{SB}} = 0.05 \text{ wt\%}$ .
- **Movie 7: d2sm00497f8.mp4**  
Constant distance state of the two droplets, accelerated 20 times.  $t \in [4 \text{ h}, 5 \text{ h}]$  and  $c_{\text{SB}} = 0.2 \text{ wt\%}$ .
- **Movie 8: d2sm00497f9.mp4**  
A real time movie of approaching motion between a  $10 \mu\text{L}$  paraffin droplet colored by Sudan black B ( $0.05 \text{ wt\%}$ ) and a  $200 \mu\text{L}$  paraffin droplet without colorant.

## S2. Diameter change of the droplets

Figure S1 shows the changes in diameter of two droplets. The diameter of decanol droplets decreased with time. The lower the SB concentration, the quicker the decrease in diameter. On the other hand, the diameter of paraffin droplets changed little over the course of the experiment.

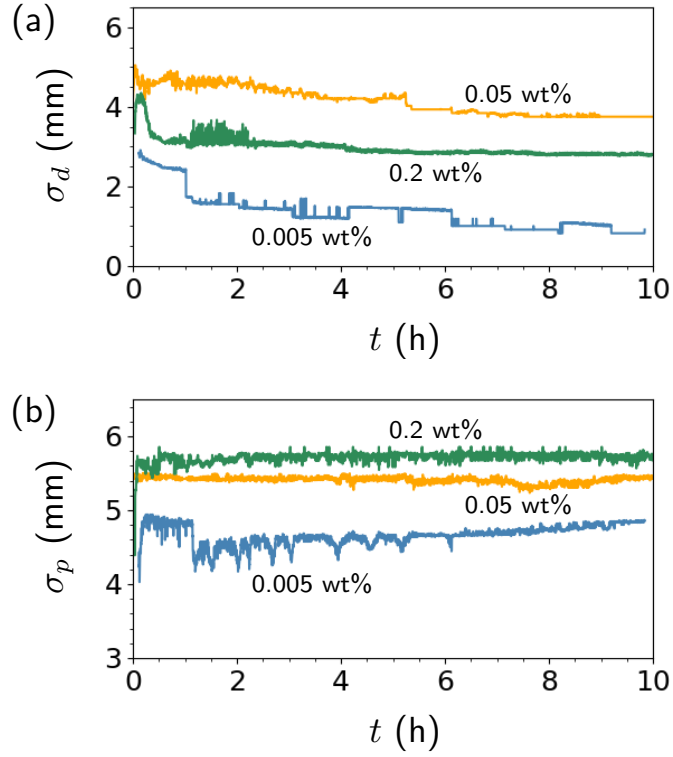

Figure S1: The diameter of (a) a decanol droplet,  $\sigma_d$  and (b) a paraffin droplet,  $\sigma_p$ , as a function of time,  $t$ . Each curve represents a result at different SB concentrations,  $c_{SB}$ .

### S3. Deeper water

Figure S2 shows the distance between two droplets as a function of time  $t$ , when the water volume was 50 ml (the depth was about 8 mm) instead of the standard values: volume 30 ml and the depth of about 5 mm. Their qualitative behavior did not change, that is, we observed a constant distance when  $c_{\text{SB}}$  was low or high and distance oscillations for the intermediate values. There are, however, qualitative differences. For example, it took longer before the trajectories were stabilized.

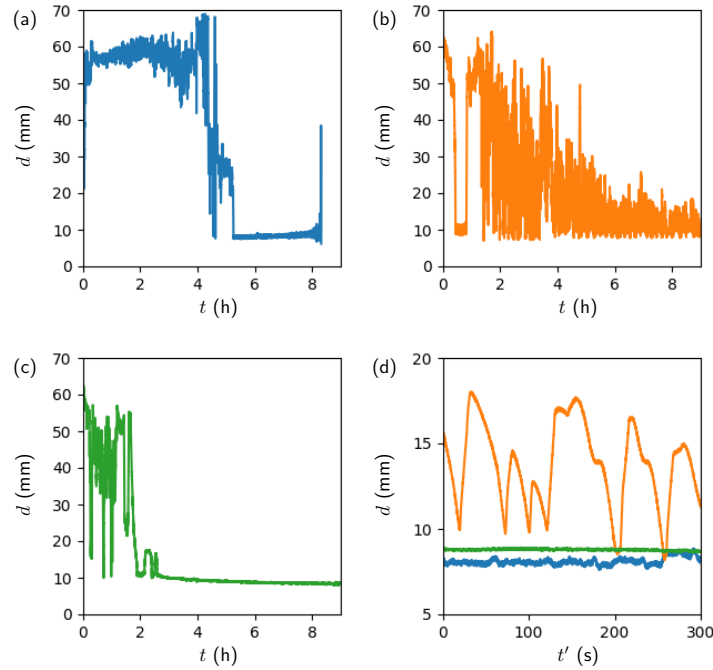

Figure S2: Distance between the two droplets as a function of time when the volume of water was 50 ml and its depth was about 8 mm. (a)  $c_{\text{SB}} = 0.005$  wt%, (b)  $c_{\text{SB}} = 0.05$  wt%, and (c)  $c_{\text{SB}} = 0.2$  wt%. (d)  $d$  in shorter time scale starting at  $t = 6$  h. Blue:  $c_{\text{SB}} = 0.005$  wt%, orange:  $c_{\text{SB}} = 0.05$  wt%, and green:  $c_{\text{SB}} = 0.2$  wt%.

## S4. Attraction between two paraffin droplets

Figure S3 shows the motion of two paraffin droplets of different sizes ( $10\ \mu\text{l}$  and  $200\ \mu\text{l}$ ). The smaller one was colored by 0.05 wt% SB. They are attracted by each other and eventually merged. Their relative speed was almost constant, about  $1\ \text{mm/s}$ , except when their distance was less than  $20\ \text{mm}$ . Beyond this distance, they accelerated significantly.

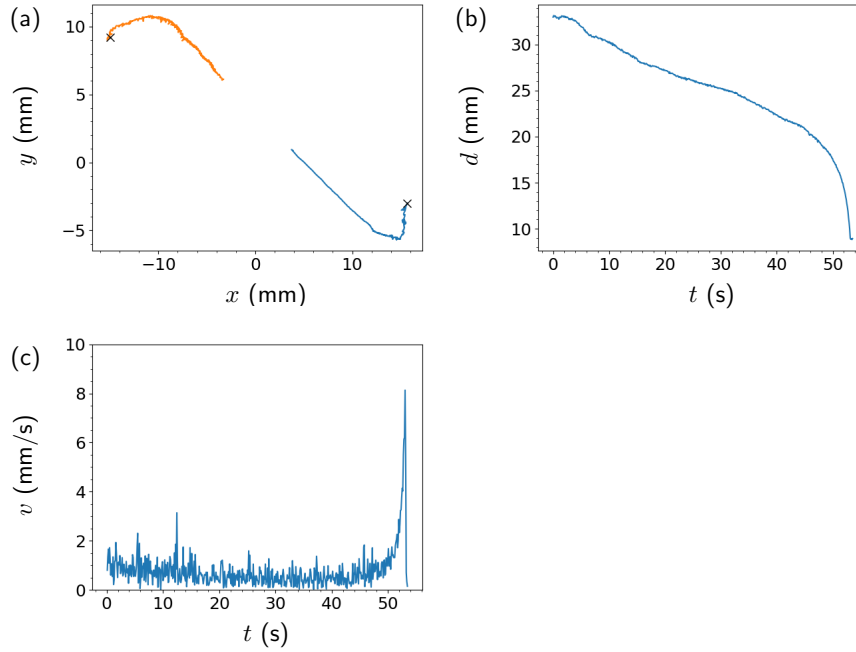

Figure S3: The attraction between a paraffin droplet of  $10\ \mu\text{l}$  and a paraffin droplet of  $200\ \mu\text{l}$ . (a) Their trajectories. The initial locations are marked by crosses. (b) The center-to-center distance between the droplets as a function of time. The droplets touched at  $d \simeq 9\ \text{mm}$ . (c) The relative speed of the smaller droplet to the larger one.

## S5. Period of simulated trajectories

Figure S4 shows the period of limit cycles and stable spirals obtained by simulations. The period changes smoothly across the boundary. Moreover, it becomes minimum at the boundary.

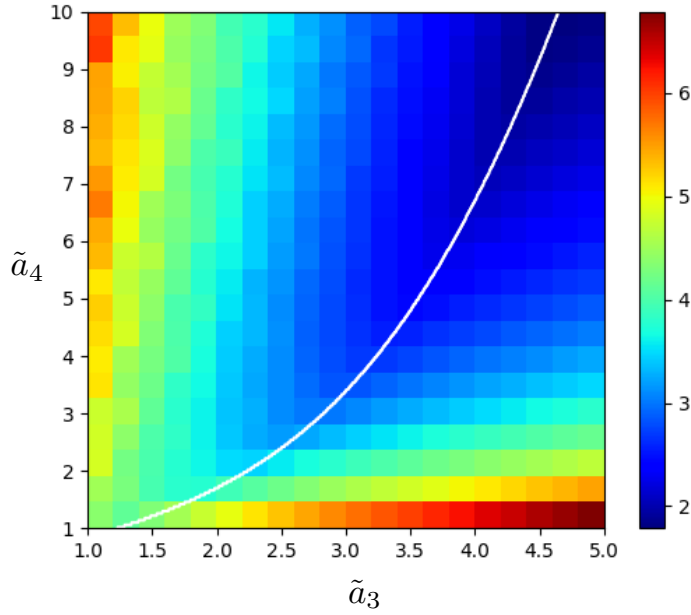

Figure S4: The period of limit cycles and stable spirals obtained by simulations, as a function of  $\tilde{a}_3$  and  $\tilde{a}_4$ .  $\tilde{a}_1 = \tilde{a}_2 = 1$ . The period was estimated as twice the average time between two consecutive time intervals at which  $\tilde{v}$  becomes 0. The white curve represents the stability boundary shown in Fig. 10 in the main text.
